# Supplementary material
Source: publisher figshare collection journal article supplement (https://acs.figshare.com/ndownloader/files/13164488)
Supplement: Supplementary file 1 [file 13164488]

Supporting Information

# **Ultrathin Manganese Dioxide Nanosheets Grown on Mesoporous Carbon Hollow Spheres for High Performance Asymmetrical Supercapacitors**

Leicong Zhang,<sup>†,‡</sup> Xuecheng Yu,<sup>†,‡</sup> Lulu Lv,<sup>†</sup> Pengli Zhu,<sup>\*,†</sup> Fengrui Zhou,<sup>†</sup> Gang Li,<sup>†</sup>

Rong Sun,<sup>†</sup> and Ching-ping Wong<sup>†,l</sup>

<sup>†</sup>Shenzhen Institutes of Advanced Technology, Chinese Academy of Sciences,  
Shenzhen 518055, China

<sup>‡</sup>Shenzhen College of Advanced Technology, University of Chinese Academy of  
Sciences, Shenzhen 518055, China

<sup>l</sup>School of Materials Science and Engineering, Georgia Institute of Technology,  
Atlanta, Georgia 30332, United States

\*Corresponding author, email: pl.zhu@siat.ac.cn

**Materials.** Absolute ethanol,  $\text{NH}_3 \cdot \text{H}_2\text{O}$  (25 wt%), formaldehyde (37 wt%),  $\text{KMnO}_4$  and  $\text{Na}_2\text{SO}_4$  were purchased from Sinopharm Chemical Reagent Co., Ltd. Tetrapropyl orthosilicate (TPOS), tetraethyl orthosilicate (TEOS), resorcinol, hydrofluoric acid (HF, 40 wt%) and 1-methyl-2-pyrrolidinone (NMP) were obtained from Aladdin Industrial Co., Ltd. The obtained HF solution was diluted to 5 wt% for next use. Other chemicals were of analytical grade and directly used in experiment.

**Calculation of loading rate of  $\text{MnO}_2$  in MCHS/ $\text{MnO}_2$  hybrid materials.** The mass loading of  $\text{MnO}_2$  in MCHS/ $\text{MnO}_2$  is calculated by the difference between MCHS/ $\text{MnO}_2$  and residual MCHS obtained by MCHS/ $\text{MnO}_2$  reacting with the excess dilute hydrochloric acid. Therefore, the loading rate of  $\text{MnO}_2$  in MCHS/ $\text{MnO}_2$  is calculated to be ~94.4% according to above mentioned difference.

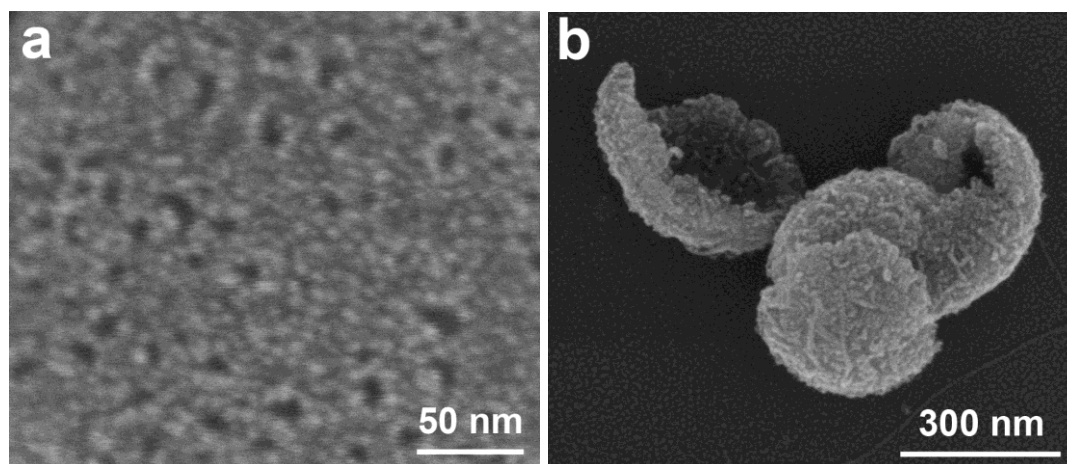

**Figure S1.** (a) High magnification SEM image of the surface of MCHS; (b) SEM image of broken MCHS/ $\text{MnO}_2$  treated by ultrasound.

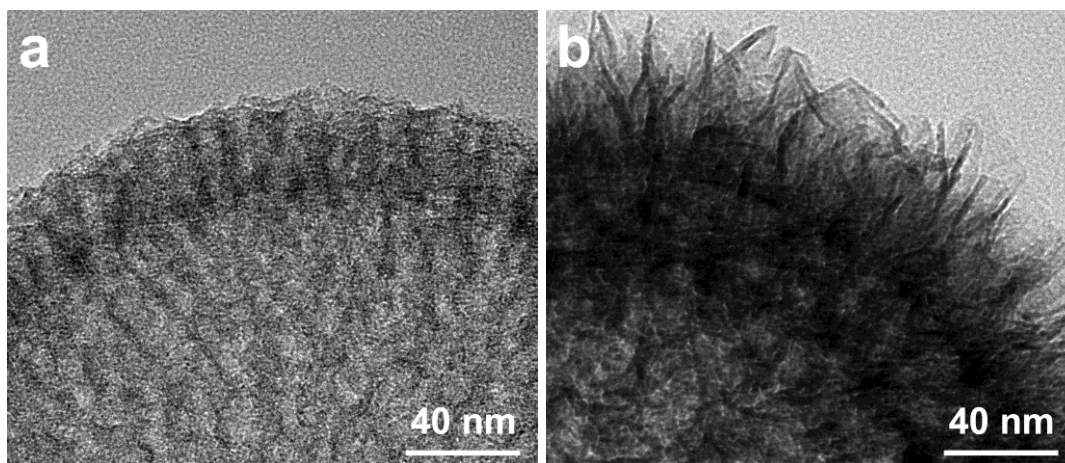

**Figure S2.** TEM images of (a) MCHS and (b) MCHS/MnO<sub>2</sub>.

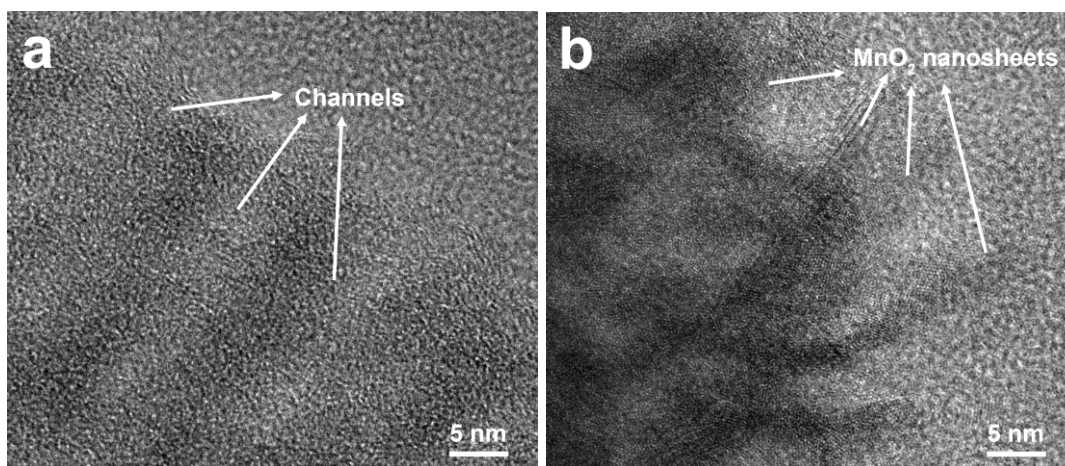

**Figure S3.** HRTEM images of (a) MCHS and (b) MCHS/MnO<sub>2</sub>.

**Figure S4.** HAADF-STEM in

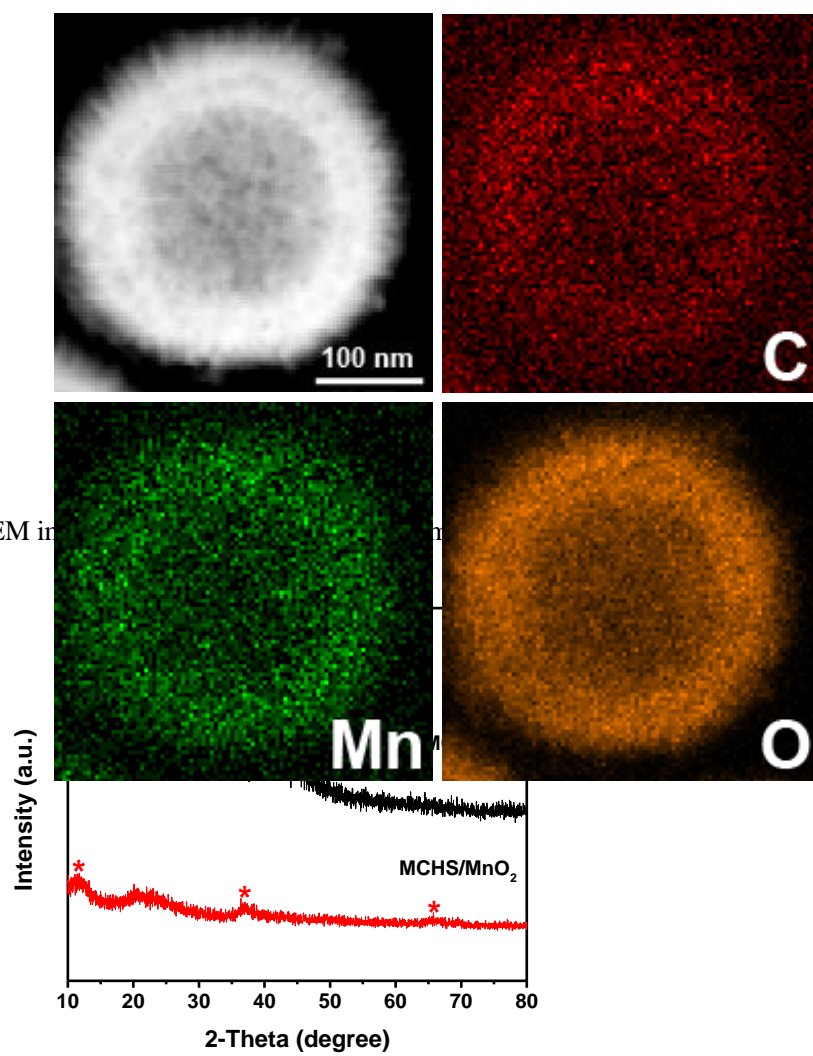

**Figure S5.** XRD patterns of MCHS and MCHS/MnO<sub>2</sub>.

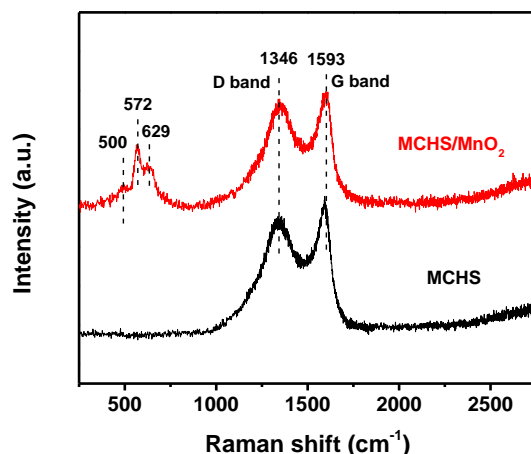

**Figure S6.** Raman spectra of MCHS and MCHS/MnO<sub>2</sub>.

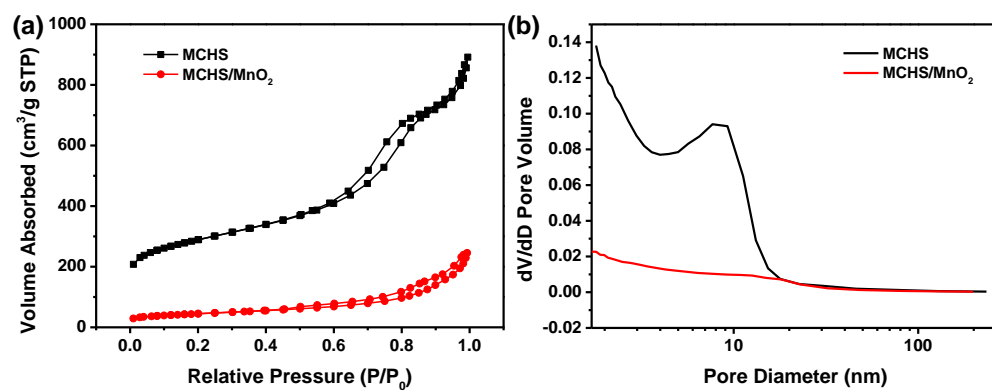

**Figure S7.** (a) N<sub>2</sub> adsorption/desorption isotherms of MCHS and MCHS/MnO<sub>2</sub> with specific surface areas of 956.7 and 154 m<sup>2</sup>/g respectively calculated by BET; (b) Pore size distribution of MCHS and MCHS/MnO<sub>2</sub>.

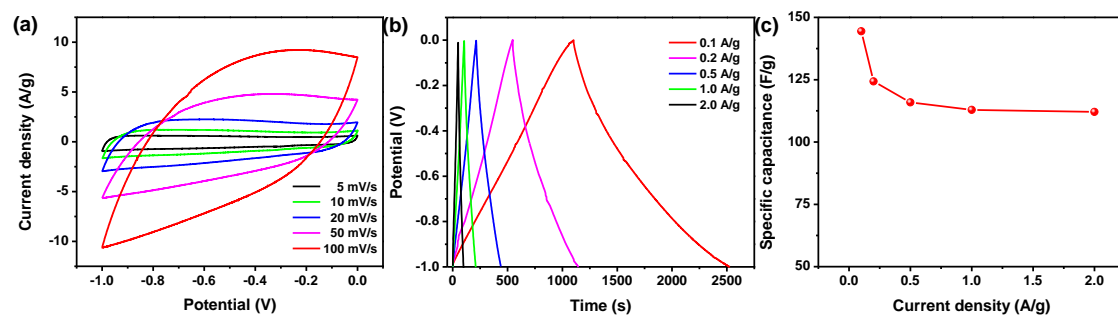

**Figure S8.** (a) CV curves of MCHS at various scan rates of 5–100 mV/s; (b) GCD curves of MCHS at various current densities of 0.1–2.0 A/g; (c) Calculated specific capacitance of MCHS

from GCD curves as a function of current density.

The electrochemical performance of prepared MCHS was characterized by electrochemical station with three-electrode system in 1 M KOH aqueous electrolyte solution. The Ni foam coated by prepared MCHS slurry, Pt plate and saturated calomel electrode were respectively served as working, counter and reference electrodes. The applied potential windows in CV and GCD tests are -1–0 V. Benefited from the hollow and mesoporous structure, MCHS exhibits the excellent electrochemical performance. The rectangle-like shape of all CV curves in Figure S8a shows the typical characteristic of electric double layer capacitance (EDLC), and the integral area increases with the scan rate and there are no distorted curves appear even at larger scan rates, indicating the well capacitance behavior of MCHS. GCD curves plotted in Figure S8b present the GCD process of MCHS at different current densities from 0.1 to 2.0 A/g, they all exhibit the approximately symmetrical triangle shape which is the typical feature of EDLC, indicating the fast electron transfer rate and ion diffusion rate of MCHS. As shown in Figure S8c, specific capacitance of MCHS calculated from GCD curve as a function of current density is plotted. Apparently, MCHS shows excellent specific capacitance of 144.4, 124.3, 115.9, 112.9 and 112.1 F/g at current density of 0.1, 0.2, 0.5, 1.0 and 2.0 A/g, respectively, and about 77.6% retention of capacitance is still achieved when current density increases from 0.1 to 2.0 A/g, indicating the well rate capability of MCHS.

**Table S1.** Comparison of electrochemical properties of supercapacitor devices.

| Electrode                                             |                                       | Electrochemical performance (device) |                                            | Reference |
|-------------------------------------------------------|---------------------------------------|--------------------------------------|--------------------------------------------|-----------|
| Positive                                              | Negative                              | Operating voltage /V                 | Maximum energy density/Wh·kg <sup>-1</sup> |           |
| MCHS/MnO <sub>2</sub>                                 | MCHS                                  | 2                                    | 64.6                                       | Our work  |
| MnCo <sub>2</sub> O <sub>4</sub> @Ni(OH) <sub>2</sub> | AC                                    | 1.6                                  | 48                                         | 15        |
| NiCo <sub>2</sub> O <sub>4</sub> @ppy                 | AC                                    | 1.6                                  | 58.8                                       | 17        |
| Ni@rGO-CO <sub>3</sub> S <sub>4</sub>                 | Ni@rGO-Ni <sub>3</sub> S <sub>4</sub> | 1.3                                  | 55.16                                      | 18        |
| CBC-N2@LDH-0.4                                        | CBC-N2                                | 1.6                                  | 36.3                                       | 19        |
| NiS/NHCS                                              | AC                                    | 1.5                                  | 38.3                                       | 23        |
| PMNC                                                  | AC                                    | 1.4                                  | 41                                         | 24        |
| CC/SnO <sub>2</sub> /MnO <sub>2</sub>                 | Ni foam/NiO                           | 1.5                                  | 64.4                                       | 29        |
| MnO <sub>2</sub>                                      | MEGO                                  | 1.6                                  | 25.8                                       | 30        |
| MnO <sub>2</sub> -NHCS                                | NHCS                                  | 1.8                                  | 26.8                                       | 40        |

The listed references are numbered in Table according to main text.
